# Supplementary material for: Bioactive Compounds in Brassicaceae Vegetables with a Role in the Prevention of Chronic Diseases
Source: PubMed Central journal article supplement (PMC5943923; doi:10.3390/molecules23010015), 2017-12-23

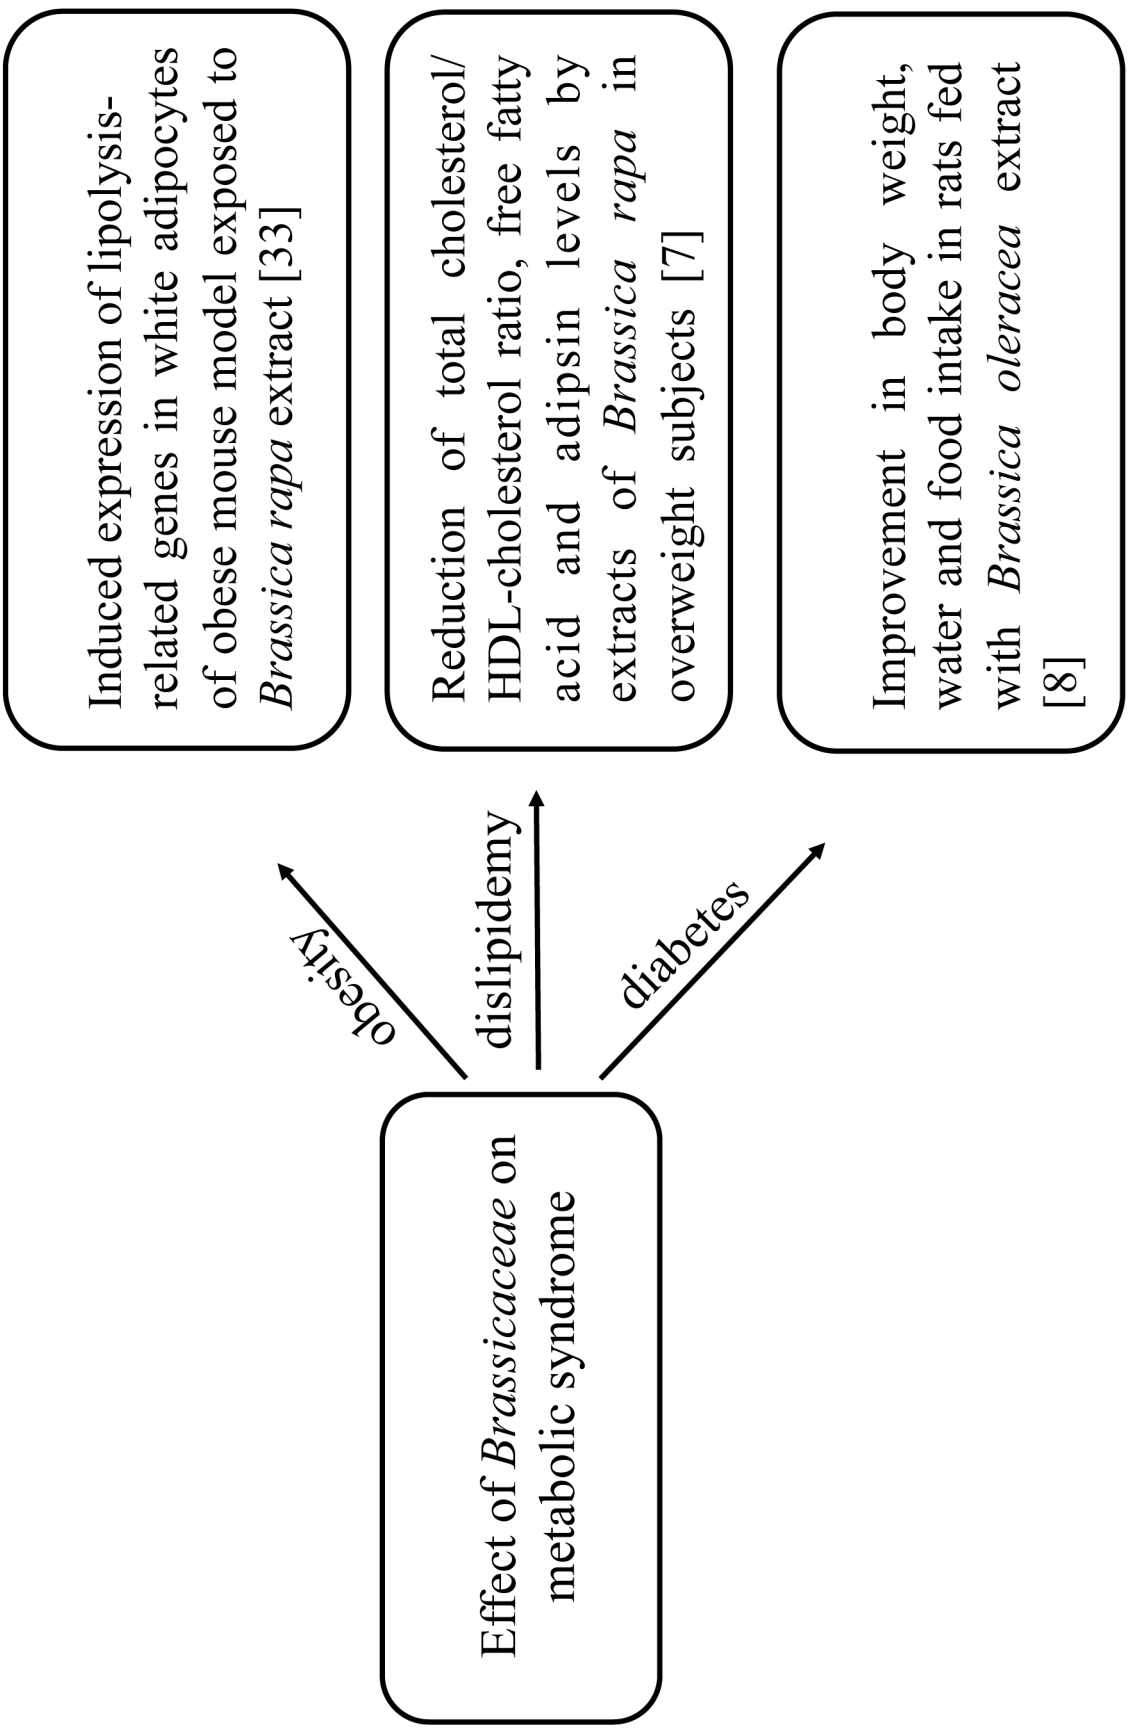

Supplement: molecules-23-00015-s001.pdf [file molecules-23-00015-s001.pdf]
